# Supplementary material
Source: PubMed Central journal article supplement (PMC8803628)
Supplement: mmc1.pdf [file mmc1.pdf]

# Covid-Epilepsy follow-up questionnaire

## General questions

Q: Have you previously completed the COVID epilepsy questionnaire on this website? (\*)

Type: choice

A: one of the following:

|     |    |            |
|-----|----|------------|
| yes | => | <i>Yes</i> |
| no  | => | <i>No</i>  |

Q: I am a person with epilepsy (\*)

Type: choice

A: one of the following:

|              |    |                                                              |
|--------------|----|--------------------------------------------------------------|
| yes          | => | <i>Yes</i>                                                   |
| no_caretaker | => | <i>No, I am a parent/caretaker of a person with epilepsy</i> |
| none         | => | <i>None of the above</i>                                     |

Q: If you are a parent/caretaker, please confirm that you will complete the questionnaire from the viewpoint of the person with epilepsy (\*)

Type: choice

A: one of the following:

|     |    |            |
|-----|----|------------|
| yes | => | <i>yes</i> |
|-----|----|------------|

Visible if

|                             |                         |
|-----------------------------|-------------------------|
| Q:                          | A:                      |
| I am a person with epilepsy | - value => no_caretaker |

Q: Age (in years) (\*)

Type: number

A: number (min: 1 / max: 110 / step: 1)

Q: Gender (\*)

Type: choice

A: one of the following:

|         |    |                          |
|---------|----|--------------------------|
| male    | => | <i>Male</i>              |
| female  | => | <i>Female</i>            |
| other   | => | <i>Other</i>             |
| not_say | => | <i>Prefer not to say</i> |

Q: Which country do you live in? (\*)

A: one of the following:

|                                |    |                                       |
|--------------------------------|----|---------------------------------------|
| Afghanistan                    | => | <i>Afghanistan</i>                    |
| Albania                        | => | <i>Albania</i>                        |
| Algeria                        | => | <i>Algeria</i>                        |
| American Samoa                 | => | <i>American Samoa</i>                 |
| Andorra                        | => | <i>Andorra</i>                        |
| Angola                         | => | <i>Angola</i>                         |
| Anguilla                       | => | <i>Anguilla</i>                       |
| Antarctica                     | => | <i>Antarctica</i>                     |
| Antigua & Barbuda              | => | <i>Antigua &amp; Barbuda</i>          |
| Argentina                      | => | <i>Argentina</i>                      |
| Armenia                        | => | <i>Armenia</i>                        |
| Aruba                          | => | <i>Aruba</i>                          |
| Ascension Island               | => | <i>Ascension Island</i>               |
| Australia                      | => | <i>Australia</i>                      |
| Austria                        | => | <i>Austria</i>                        |
| Azerbaijan                     | => | <i>Azerbaijan</i>                     |
| Bahamas                        | => | <i>Bahamas</i>                        |
| Bahrain                        | => | <i>Bahrain</i>                        |
| Bangladesh                     | => | <i>Bangladesh</i>                     |
| Barbados                       | => | <i>Barbados</i>                       |
| Belarus                        | => | <i>Belarus</i>                        |
| Belgium                        | => | <i>Belgium</i>                        |
| Belize                         | => | <i>Belize</i>                         |
| Benin                          | => | <i>Benin</i>                          |
| Bermuda                        | => | <i>Bermuda</i>                        |
| Bhutan                         | => | <i>Bhutan</i>                         |
| Bolivia                        | => | <i>Bolivia</i>                        |
| Bosnia & Herzegovina           | => | <i>Bosnia &amp; Herzegovina</i>       |
| Botswana                       | => | <i>Botswana</i>                       |
| Bouvet Island                  | => | <i>Bouvet Island</i>                  |
| Brazil                         | => | <i>Brazil</i>                         |
| British Indian Ocean Territory | => | <i>British Indian Ocean Territory</i> |
| British Virgin Islands         | => | <i>British Virgin Islands</i>         |
| Brunei                         | => | <i>Brunei</i>                         |
| Bulgaria                       | => | <i>Bulgaria</i>                       |
| Burkina Faso                   | => | <i>Burkina Faso</i>                   |
| Burundi                        | => | <i>Burundi</i>                        |
| Cambodia                       | => | <i>Cambodia</i>                       |
| Cameroon                       | => | <i>Cameroon</i>                       |
| Canada                         | => | <i>Canada</i>                         |
| Canary Islands                 | => | <i>Canary Islands</i>                 |
| Cape Verde                     | => | <i>Cape Verde</i>                     |
| Caribbean Netherlands          | => | <i>Caribbean Netherlands</i>          |

|                             |    |                                    |
|-----------------------------|----|------------------------------------|
| Cayman Islands              | => | <i>Cayman Islands</i>              |
| Central African Republic    | => | <i>Central African Republic</i>    |
| Ceuta & Melilla             | => | <i>Ceuta &amp; Melilla</i>         |
| Chad                        | => | <i>Chad</i>                        |
| Chile                       | => | <i>Chile</i>                       |
| China                       | => | <i>China</i>                       |
| Christmas Island            | => | <i>Christmas Island</i>            |
| Clipperton Island           | => | <i>Clipperton Island</i>           |
| Cocos (Keeling) Islands     | => | <i>Cocos (Keeling) Islands</i>     |
| Colombia                    | => | <i>Colombia</i>                    |
| Comoros                     | => | <i>Comoros</i>                     |
| Congo - Brazzaville         | => | <i>Congo - Brazzaville</i>         |
| Congo - Kinshasa            | => | <i>Congo - Kinshasa</i>            |
| Cook Islands                | => | <i>Cook Islands</i>                |
| Costa Rica                  | => | <i>Costa Rica</i>                  |
| Croatia                     | => | <i>Croatia</i>                     |
| Cuba                        | => | <i>Cuba</i>                        |
| Curaçao                     | => | <i>Curaçao</i>                     |
| Cyprus                      | => | <i>Cyprus</i>                      |
| Czechia                     | => | <i>Czechia</i>                     |
| Côte d'Ivoire               | => | <i>Côte d'Ivoire</i>               |
| Denmark                     | => | <i>Denmark</i>                     |
| Diego Garcia                | => | <i>Diego Garcia</i>                |
| Djibouti                    | => | <i>Djibouti</i>                    |
| Dominica                    | => | <i>Dominica</i>                    |
| Dominican Republic          | => | <i>Dominican Republic</i>          |
| Ecuador                     | => | <i>Ecuador</i>                     |
| Egypt                       | => | <i>Egypt</i>                       |
| El Salvador                 | => | <i>El Salvador</i>                 |
| Equatorial Guinea           | => | <i>Equatorial Guinea</i>           |
| Eritrea                     | => | <i>Eritrea</i>                     |
| Estonia                     | => | <i>Estonia</i>                     |
| Eswatini                    | => | <i>Eswatini</i>                    |
| Ethiopia                    | => | <i>Ethiopia</i>                    |
| Falkland Islands            | => | <i>Falkland Islands</i>            |
| Faroe Islands               | => | <i>Faroe Islands</i>               |
| Fiji                        | => | <i>Fiji</i>                        |
| Finland                     | => | <i>Finland</i>                     |
| France                      | => | <i>France</i>                      |
| French Guiana               | => | <i>French Guiana</i>               |
| French Polynesia            | => | <i>French Polynesia</i>            |
| French Southern Territories | => | <i>French Southern Territories</i> |
| Gabon                       | => | <i>Gabon</i>                       |
| Gambia                      | => | <i>Gambia</i>                      |
| Georgia                     | => | <i>Georgia</i>                     |
| Germany                     | => | <i>Germany</i>                     |

|                          |    |                                     |
|--------------------------|----|-------------------------------------|
| Ghana                    | => | <i>Ghana</i>                        |
| Gibraltar                | => | <i>Gibraltar</i>                    |
| Greece                   | => | <i>Greece</i>                       |
| Greenland                | => | <i>Greenland</i>                    |
| Grenada                  | => | <i>Grenada</i>                      |
| Guadeloupe               | => | <i>Guadeloupe</i>                   |
| Guam                     | => | <i>Guam</i>                         |
| Guatemala                | => | <i>Guatemala</i>                    |
| Guernsey                 | => | <i>Guernsey</i>                     |
| Guinea                   | => | <i>Guinea</i>                       |
| Guinea-Bissau            | => | <i>Guinea-Bissau</i>                |
| Guyana                   | => | <i>Guyana</i>                       |
| Haiti                    | => | <i>Haiti</i>                        |
| Heard & McDonald Islands | => | <i>Heard &amp; McDonald Islands</i> |
| Honduras                 | => | <i>Honduras</i>                     |
| Hong Kong SAR China      | => | <i>Hong Kong SAR China</i>          |
| Hungary                  | => | <i>Hungary</i>                      |
| Iceland                  | => | <i>Iceland</i>                      |
| India                    | => | <i>India</i>                        |
| Indonesia                | => | <i>Indonesia</i>                    |
| Iran                     | => | <i>Iran</i>                         |
| Iraq                     | => | <i>Iraq</i>                         |
| Ireland                  | => | <i>Ireland</i>                      |
| Isle of Man              | => | <i>Isle of Man</i>                  |
| Israel                   | => | <i>Israel</i>                       |
| Italy                    | => | <i>Italy</i>                        |
| Jamaica                  | => | <i>Jamaica</i>                      |
| Japan                    | => | <i>Japan</i>                        |
| Jersey                   | => | <i>Jersey</i>                       |
| Jordan                   | => | <i>Jordan</i>                       |
| Kazakhstan               | => | <i>Kazakhstan</i>                   |
| Kenya                    | => | <i>Kenya</i>                        |
| Kiribati                 | => | <i>Kiribati</i>                     |
| Kosovo                   | => | <i>Kosovo</i>                       |
| Kuwait                   | => | <i>Kuwait</i>                       |
| Kyrgyzstan               | => | <i>Kyrgyzstan</i>                   |
| Laos                     | => | <i>Laos</i>                         |
| Latvia                   | => | <i>Latvia</i>                       |
| Lebanon                  | => | <i>Lebanon</i>                      |
| Lesotho                  | => | <i>Lesotho</i>                      |
| Liberia                  | => | <i>Liberia</i>                      |
| Libya                    | => | <i>Libya</i>                        |
| Liechtenstein            | => | <i>Liechtenstein</i>                |
| Lithuania                | => | <i>Lithuania</i>                    |
| Luxembourg               | => | <i>Luxembourg</i>                   |
| Macao SAR China          | => | <i>Macao SAR China</i>              |

|                          |    |                                 |
|--------------------------|----|---------------------------------|
| Madagascar               | => | <i>Madagascar</i>               |
| Malawi                   | => | <i>Malawi</i>                   |
| Malaysia                 | => | <i>Malaysia</i>                 |
| Maldives                 | => | <i>Maldives</i>                 |
| Mali                     | => | <i>Mali</i>                     |
| Malta                    | => | <i>Malta</i>                    |
| Marshall Islands         | => | <i>Marshall Islands</i>         |
| Martinique               | => | <i>Martinique</i>               |
| Mauritania               | => | <i>Mauritania</i>               |
| Mauritius                | => | <i>Mauritius</i>                |
| Mayotte                  | => | <i>Mayotte</i>                  |
| Mexico                   | => | <i>Mexico</i>                   |
| Micronesia               | => | <i>Micronesia</i>               |
| Moldova                  | => | <i>Moldova</i>                  |
| Monaco                   | => | <i>Monaco</i>                   |
| Mongolia                 | => | <i>Mongolia</i>                 |
| Montenegro               | => | <i>Montenegro</i>               |
| Montserrat               | => | <i>Montserrat</i>               |
| Morocco                  | => | <i>Morocco</i>                  |
| Mozambique               | => | <i>Mozambique</i>               |
| Myanmar (Burma)          | => | <i>Myanmar (Burma)</i>          |
| Namibia                  | => | <i>Namibia</i>                  |
| Nauru                    | => | <i>Nauru</i>                    |
| Nepal                    | => | <i>Nepal</i>                    |
| Netherlands              | => | <i>Netherlands</i>              |
| Netherlands Antilles     | => | <i>Netherlands Antilles</i>     |
| New Caledonia            | => | <i>New Caledonia</i>            |
| New Zealand              | => | <i>New Zealand</i>              |
| Nicaragua                | => | <i>Nicaragua</i>                |
| Niger                    | => | <i>Niger</i>                    |
| Nigeria                  | => | <i>Nigeria</i>                  |
| Niue                     | => | <i>Niue</i>                     |
| Norfolk Island           | => | <i>Norfolk Island</i>           |
| Northern Mariana Islands | => | <i>Northern Mariana Islands</i> |
| North Korea              | => | <i>North Korea</i>              |
| North Macedonia          | => | <i>North Macedonia</i>          |
| Norway                   | => | <i>Norway</i>                   |
| Oman                     | => | <i>Oman</i>                     |
| Outlying Oceania         | => | <i>Outlying Oceania</i>         |
| Pakistan                 | => | <i>Pakistan</i>                 |
| Palau                    | => | <i>Palau</i>                    |
| Palestinian Territories  | => | <i>Palestinian Territories</i>  |
| Panama                   | => | <i>Panama</i>                   |
| Papua New Guinea         | => | <i>Papua New Guinea</i>         |
| Paraguay                 | => | <i>Paraguay</i>                 |
| Peru                     | => | <i>Peru</i>                     |

|                                        |    |                                                   |
|----------------------------------------|----|---------------------------------------------------|
| Philippines                            | => | <i>Philippines</i>                                |
| Pitcairn Islands                       | => | <i>Pitcairn Islands</i>                           |
| Poland                                 | => | <i>Poland</i>                                     |
| Portugal                               | => | <i>Portugal</i>                                   |
| Puerto Rico                            | => | <i>Puerto Rico</i>                                |
| Qatar                                  | => | <i>Qatar</i>                                      |
| Romania                                | => | <i>Romania</i>                                    |
| Russia                                 | => | <i>Russia</i>                                     |
| Rwanda                                 | => | <i>Rwanda</i>                                     |
| Réunion                                | => | <i>Réunion</i>                                    |
| Samoa                                  | => | <i>Samoa</i>                                      |
| San Marino                             | => | <i>San Marino</i>                                 |
| Saudi Arabia                           | => | <i>Saudi Arabia</i>                               |
| Senegal                                | => | <i>Senegal</i>                                    |
| Serbia                                 | => | <i>Serbia</i>                                     |
| Seychelles                             | => | <i>Seychelles</i>                                 |
| Sierra Leone                           | => | <i>Sierra Leone</i>                               |
| Singapore                              | => | <i>Singapore</i>                                  |
| Sint Maarten                           | => | <i>Sint Maarten</i>                               |
| Slovakia                               | => | <i>Slovakia</i>                                   |
| Slovenia                               | => | <i>Slovenia</i>                                   |
| Solomon Islands                        | => | <i>Solomon Islands</i>                            |
| Somalia                                | => | <i>Somalia</i>                                    |
| South Africa                           | => | <i>South Africa</i>                               |
| South Georgia & South Sandwich Islands | => | <i>South Georgia &amp; South Sandwich Islands</i> |
| South Korea                            | => | <i>South Korea</i>                                |
| South Sudan                            | => | <i>South Sudan</i>                                |
| Spain                                  | => | <i>Spain</i>                                      |
| Sri Lanka                              | => | <i>Sri Lanka</i>                                  |
| St. Barthélemy                         | => | <i>St. Barthélemy</i>                             |
| St. Helena                             | => | <i>St. Helena</i>                                 |
| St. Kitts & Nevis                      | => | <i>St. Kitts &amp; Nevis</i>                      |
| St. Lucia                              | => | <i>St. Lucia</i>                                  |
| St. Martin                             | => | <i>St. Martin</i>                                 |
| St. Pierre & Miquelon                  | => | <i>St. Pierre &amp; Miquelon</i>                  |
| St. Vincent & Grenadines               | => | <i>St. Vincent &amp; Grenadines</i>               |
| Sudan                                  | => | <i>Sudan</i>                                      |
| Suriname                               | => | <i>Suriname</i>                                   |
| Svalbard & Jan Mayen                   | => | <i>Svalbard &amp; Jan Mayen</i>                   |
| Sweden                                 | => | <i>Sweden</i>                                     |
| Switzerland                            | => | <i>Switzerland</i>                                |
| Syria                                  | => | <i>Syria</i>                                      |
| São Tomé & Príncipe                    | => | <i>São Tomé &amp; Príncipe</i>                    |
| Taiwan                                 | => | <i>Taiwan</i>                                     |
| Tajikistan                             | => | <i>Tajikistan</i>                                 |

|                        |    |                                   |
|------------------------|----|-----------------------------------|
| Tanzania               | => | <i>Tanzania</i>                   |
| Thailand               | => | <i>Thailand</i>                   |
| Timor-Leste            | => | <i>Timor-Leste</i>                |
| Togo                   | => | <i>Togo</i>                       |
| Tokelau                | => | <i>Tokelau</i>                    |
| Tonga                  | => | <i>Tonga</i>                      |
| Trinidad & Tobago      | => | <i>Trinidad &amp; Tobago</i>      |
| Tristan da Cunha       | => | <i>Tristan da Cunha</i>           |
| Tunisia                | => | <i>Tunisia</i>                    |
| Turkey                 | => | <i>Turkey</i>                     |
| Turkmenistan           | => | <i>Turkmenistan</i>               |
| Turks & Caicos Islands | => | <i>Turks &amp; Caicos Islands</i> |
| Tuvalu                 | => | <i>Tuvalu</i>                     |
| U.S. Outlying Islands  | => | <i>U.S. Outlying Islands</i>      |
| U.S. Virgin Islands    | => | <i>U.S. Virgin Islands</i>        |
| Uganda                 | => | <i>Uganda</i>                     |
| Ukraine                | => | <i>Ukraine</i>                    |
| United Arab Emirates   | => | <i>United Arab Emirates</i>       |
| United Kingdom         | => | <i>United Kingdom</i>             |
| United States          | => | <i>United States</i>              |
| Uruguay                | => | <i>Uruguay</i>                    |
| Uzbekistan             | => | <i>Uzbekistan</i>                 |
| Vanuatu                | => | <i>Vanuatu</i>                    |
| Vatican City           | => | <i>Vatican City</i>               |
| Venezuela              | => | <i>Venezuela</i>                  |
| Vietnam                | => | <i>Vietnam</i>                    |
| Wallis & Futuna        | => | <i>Wallis &amp; Futuna</i>        |
| Western Sahara         | => | <i>Western Sahara</i>             |
| Yemen                  | => | <i>Yemen</i>                      |
| Zambia                 | => | <i>Zambia</i>                     |
| Zimbabwe               | => | <i>Zimbabwe</i>                   |
| Åland Islands          | => | <i>Åland Islands</i>              |

**Q: Which city do you live in? (\*)**

Type: text

A: text input

**Q: Relationship status (\*)**

Type: choice

A: one of the following:

|                   |    |                                     |
|-------------------|----|-------------------------------------|
| single            | => | <i>Single</i>                       |
| in_a_relationship | => | <i>In a relationship or married</i> |

Q: Maximum educational level (\*)

Type: choice

A: one of the following:

|                                        |    |                                        |
|----------------------------------------|----|----------------------------------------|
| primary                                | => | <i>Primary</i>                         |
| secondary                              | => | <i>Secondary</i>                       |
| university_undergraduate_degree_holder | => | <i>University undergraduate degree</i> |
| university_postgraduate_degree         | => | <i>University postgraduate degree</i>  |
| none                                   | => | <i>None</i>                            |

Q: Who do you currently live with? (many answers possible) (\*)

Type: choice\_multiple

A: multiple answers possible:

|                    |    |                                              |
|--------------------|----|----------------------------------------------|
| parents            | => | <i>My parents</i>                            |
| spouse_partner     | => | <i>My spouse/partner</i>                     |
| children           | => | <i>My child(ren)</i>                         |
| siblings_relatives | => | <i>My siblings or other family relatives</i> |
| friend             | => | <i>My friend(s)</i>                          |
| alone              | => | <i>I live alone</i>                          |

Q: How would you describe your socio-economic situation? (multiple answers possible) (\*)

Type: choice\_multiple

A: multiple answers possible:

|                      |    |                                                               |
|----------------------|----|---------------------------------------------------------------|
| difficulties_feeding | => | <i>Financial difficulties to feed properly</i>                |
| difficulties_housing | => | <i>Financial difficulties to pay for housing/bills</i>        |
| difficulties_drugs   | => | <i>Financial difficulties to pay for anti-epileptic drugs</i> |
| no_difficulties      | => | <i>No financial difficulties</i>                              |

Q: What is your job status at this moment? (\*)

Type: choice

A: one of the following:

|               |    |                               |
|---------------|----|-------------------------------|
| self-employed | => | <i>I am self-employed</i>     |
| employee      | => | <i>I am an employee</i>       |
| retired       | => | <i>I am retired</i>           |
| no_job        | => | <i>I have no job</i>          |
| student       | => | <i>I am a student</i>         |
| other         | => | <i>Other (please specify)</i> |

Q: Please specify your job status



Type:  
text

A: text input

Visible if

|                                         |                     |
|-----------------------------------------|---------------------|
| Q:                                      | A:                  |
| What is your job status at this moment? | - value =><br>other |

Q: If you have no job, were you already jobless before the implementation of COVID-19 restrictions in your country? (\*)

Type: choice

A: one of the following:

|     |    |            |
|-----|----|------------|
| yes | => | <i>Yes</i> |
| no  | => | <i>No</i>  |

Visible if

|                                         |                      |
|-----------------------------------------|----------------------|
| Q:                                      | A:                   |
| What is your job status at this moment? | - value =><br>no_job |

## Psychosocial status: HADS-A and HADS-D

Tick the box beside the reply that is closest to how you have been feeling in the past week. Don't take too long over your replies; your immediate answer is the best.

HADS-A

Q: I feel tense or wound up (\*)

Type: choice

A: one of the following:

|   |    |                                            |
|---|----|--------------------------------------------|
| 0 | => | <i>Not at all</i>                          |
| 1 | => | <i>From time to time,<br/>occasionally</i> |
| 2 | => | <i>Often</i>                               |
| 3 | => | <i>Most of the time</i>                    |

Q: I get a sort of frightened feeling as if something awful is about to happen (\*)

Type: choice

A: one of the following:

|   |    |                                               |
|---|----|-----------------------------------------------|
| 3 | => | <i>Very definitely and quite badly</i>        |
| 2 | => | <i>Yes, but not too badly</i>                 |
| 1 | => | <i>A little, but it does not worry<br/>me</i> |
| 0 | => | <i>Not at all</i>                             |

Q: Worrying thoughts go through my mind (\*)

Type: choice

A: one of the following:

|   |    |                                             |
|---|----|---------------------------------------------|
| 3 | => | <i>Most of the time</i>                     |
| 2 | => | <i>Often</i>                                |
| 1 | => | <i>From time to time, but not too often</i> |
| 0 | => | <i>Only occasionally</i>                    |

Q: I can sit at ease and feel relaxed (\*)

Type: choice

A: one of the following:

|   |    |                   |
|---|----|-------------------|
| 0 | => | <i>Definitely</i> |
| 1 | => | <i>Usually</i>    |
| 2 | => | <i>Not often</i>  |
| 3 | => | <i>Not at all</i> |

Q: I get a sort of frightened feeling like butterflies in the stomach (\*)

Type: choice

A: one of the following:

|   |    |                     |
|---|----|---------------------|
| 0 | => | <i>Not at all</i>   |
| 1 | => | <i>Occasionally</i> |
| 2 | => | <i>Quite often</i>  |
| 3 | => | <i>Very often</i>   |

Q: I feel restless as if I have to be on the move (\*)

Type: choice

A: one of the following:

|   |    |                         |
|---|----|-------------------------|
| 3 | => | <i>Very much indeed</i> |
| 2 | => | <i>Quite often</i>      |
| 1 | => | <i>Occasionally</i>     |
| 0 | => | <i>Not at all</i>       |

Q: I get sudden feelings of panic (\*)

Type: choice

A: one of the following:

|   |    |                          |
|---|----|--------------------------|
| 3 | => | <i>Very often indeed</i> |
| 2 | => | <i>Quite often</i>       |
| 1 | => | <i>Occasionally</i>      |
| 0 | => | <i>Not at all</i>        |

## HADS-D

**Q: I still enjoy the things I used to enjoy (\*)**

Type: choice

A: one of the following:

|   |    |                           |
|---|----|---------------------------|
| 0 | => | <i>Definitely as much</i> |
| 1 | => | <i>Not quite as much</i>  |
| 2 | => | <i>Only a little</i>      |
| 3 | => | <i>Hardly at all</i>      |

**Q: I can laugh and see the funny side of things (\*)**

Type: choice

A: one of the following:

|   |    |                                   |
|---|----|-----------------------------------|
| 0 | => | <i>As much as I always could</i>  |
| 1 | => | <i>Not quite so much now</i>      |
| 2 | => | <i>Definitely not so much now</i> |
| 3 | => | <i>Not at all</i>                 |

**Q: I feel cheerful (\*)**

Type: choice

A: one of the following:

|   |    |                         |
|---|----|-------------------------|
| 3 | => | <i>Not at all</i>       |
| 2 | => | <i>Not often</i>        |
| 1 | => | <i>Sometimes</i>        |
| 0 | => | <i>Most of the time</i> |

**Q: I feel as if I am slowed down (\*)**

Type: choice

A: one of the following:

|   |    |                            |
|---|----|----------------------------|
| 3 | => | <i>Nearly all the time</i> |
| 2 | => | <i>Very often</i>          |
| 1 | => | <i>Sometimes</i>           |
| 0 | => | <i>Not at all</i>          |

**Q: I have lost interest in my appearance (\*)**

Type: choice

A: one of the following:

|   |    |                                              |
|---|----|----------------------------------------------|
| 3 | => | <i>Definitely</i>                            |
| 2 | => | <i>I don't take as much care as I should</i> |
| 1 | => | <i>I may not take quite as much care</i>     |
| 0 | => | <i>I take just as much care as ever</i>      |

**Q: I look forward with enjoyment to things (\*)**

Type: choice

A: one of the following:

|   |    |                                       |
|---|----|---------------------------------------|
| 0 | => | <i>As much as I ever did</i>          |
| 1 | => | <i>Rather less than I used to</i>     |
| 2 | => | <i>Definitely less than I used to</i> |
| 3 | => | <i>Hardly at all</i>                  |

**Q: I can enjoy a good book or radio or TV program (\*)**

Type: choice

A: one of the following:

|   |    |                    |
|---|----|--------------------|
| 0 | => | <i>Often</i>       |
| 1 | => | <i>Sometimes</i>   |
| 2 | => | <i>Not often</i>   |
| 3 | => | <i>Very seldom</i> |

## Covid-related questions

**Q: Since the onset of COVID-19 in your country, have you experienced any of the following flu-like symptoms? (multiple answers possible) (\*)**

Type: choice\_multiple

A: multiple answers possible:

|                  |    |                                   |
|------------------|----|-----------------------------------|
| fever            | => | <i>Fever</i>                      |
| headaches        | => | <i>Headaches</i>                  |
| sore_throat      | => | <i>Sore throat</i>                |
| loss_taste       | => | <i>Loss of taste</i>              |
| loss_smell       | => | <i>Loss of smell</i>              |
| stuffy_nose      | => | <i>Stuffy and/or running nose</i> |
| dry_cough        | => | <i>Dry cough</i>                  |
| productive_cough | => | <i>Productive cough</i>           |
| shortness_breath | => | <i>Shortness of breath</i>        |
| muscle_pain      | => | <i>Muscle or body pains</i>       |
| weakness         | => | <i>General weakness</i>           |
| nausea           | => | <i>Nausea</i>                     |
| diarrhea         | => | <i>Diarrhea</i>                   |
| other            | => | <i>Other symptoms (specify)</i>   |

|             |    |                          |
|-------------|----|--------------------------|
| no_symptoms | => | <i>I had no symptoms</i> |
|-------------|----|--------------------------|

**Q: Specify other symptom**

Type:  
text

A: text input

Visible if

|                                                                                                   |    |
|---------------------------------------------------------------------------------------------------|----|
| Q:                                                                                                | A: |
| :input[name="which_symptoms_did_you_experience_multiple_answers_possible_[other]"] - checked => 1 |    |

**Q: When did these symptoms appear?**

Type: choice

A: one of the following:

|                       |    |                              |
|-----------------------|----|------------------------------|
| last_two_weeks        | => | <i>Last two weeks</i>        |
| last_month            | => | <i>Last month</i>            |
| more_than_a_month_ago | => | <i>More than a month ago</i> |

**Q: Since the beginning of the epidemic, have you been tested for COVID-19 infection? (\*)**

Type: choice

A: one of the following:

|             |    |                    |
|-------------|----|--------------------|
| yes         | => | <i>Yes</i>         |
| no          | => | <i>No</i>          |
| do_not_know | => | <i>Do not know</i> |

**Q: What was the result of the test? (\*)**

Type: choice

A: one of the following:

|                   |    |                                     |
|-------------------|----|-------------------------------------|
| positive          | => | <i>Positive</i>                     |
| negative          | => | <i>Negative</i>                     |
| do_not_know       | => | <i>Do not know</i>                  |
| positive_negative | => | <i>First positive, now negative</i> |
| negative_positive | => | <i>First negative, now positive</i> |

Visible if

|                                                                                   |                |
|-----------------------------------------------------------------------------------|----------------|
| Q:                                                                                | A:             |
| Since the beginning of the epidemic, have you been tested for COVID-19 infection? | - value => yes |

**Q: When did your first test get positive?**

Type: choice

A: one of the following:

|                       |    |                              |
|-----------------------|----|------------------------------|
| last_two_weeks        | => | <i>Last two weeks</i>        |
| last_month            | => | <i>Last month</i>            |
| more_than_a_month_ago | => | <i>More than a month ago</i> |

Visible if

|                                                        |
|--------------------------------------------------------|
| Q: A:                                                  |
| 0 - :input[name="what_was_the_result_of_the_test_"] => |
| 1                                                      |
| 2 - :input[name="what_was_the_result_of_the_test_"] => |
| 3                                                      |
| 4 - :input[name="what_was_the_result_of_the_test_"] => |

Q: What was the reason you were tested? (\*)

Type: choice

A: one of the following:

|                         |    |                                                                         |
|-------------------------|----|-------------------------------------------------------------------------|
| contact                 | => | <i>I was in close contact with someone who had COVID-19 infection</i>   |
| mandatory_screening     | => | <i>Mandatory screening at work</i>                                      |
| regular                 | => | <i>Regular screening before a medical procedure, e.g. pre-operative</i> |
| mass_screening_campaign | => | <i>Mass screening campaign in my neighbourhood</i>                      |
| symptoms                | => | <i>I had flu-like symptoms</i>                                          |
| do_not_know             | => | <i>Do not know</i>                                                      |

Visible if

|                                                                                   |                |
|-----------------------------------------------------------------------------------|----------------|
| Q:                                                                                | A:             |
| Since the beginning of the epidemic, have you been tested for COVID-19 infection? | - value => yes |

## Impact of COVID-19

Q: Where confinement measures implemented in your town residence? (\*)

Type: choice

A: one of the following:

|     |    |            |
|-----|----|------------|
| yes | => | <i>Yes</i> |
| no  | => | <i>No</i>  |

Q: How did COVID-19 measures impact your daily life? (multiple answers possible) (\*)

Type: choice\_multiple

A: multiple answers possible:

|          |    |                      |
|----------|----|----------------------|
| lost_job | => | <i>I lost my job</i> |
|----------|----|----------------------|

|                   |    |                                                                                                     |
|-------------------|----|-----------------------------------------------------------------------------------------------------|
| work_home         | => | <i>I had to work from home</i>                                                                      |
| temporary_jobless | => | <i>I was temporary jobless since I cannot work from home and was not allowed to work in company</i> |
| not_go_outside    | => | <i>I was not allowed to go outside except for going to the supermarket</i>                          |
| not_see_people    | => | <i>I was not allowed to see people other than my housemates</i>                                     |
| care_children     | => | <i>I had to care for my children every day</i>                                                      |
| other             | => | <i>Other (please specify)</i>                                                                       |
| no-impact         | => | <i>No impact</i>                                                                                    |

**Q: Other (please specify)**

Type: text

A: text input

Visible if

Q: A:  
 :input[name="how\_did\_covid\_impact\_your\_daily\_life\_multiple\_answers\_possible\_[other]"] - checked => 1

**Q: How have the COVID-19 measures impacted your finances over the last few months? (\*)**

Type: choice\_scale

A: Impact of COVID-19 lockdown on my income | Impact of COVID-19 lockdown on my expenditure

|                |    |                       |
|----------------|----|-----------------------|
| increased      | => | <i>Increased</i>      |
| decreased      | => | <i>Decreased</i>      |
| no_change      | => | <i>No change</i>      |
| not_applicable | => | <i>Not applicable</i> |

**Q: If your income decreased during/after COVID-19 lockdown, please specify the reason (\*)**

Type: choice

A: one of the following:

|             |    |                                                              |
|-------------|----|--------------------------------------------------------------|
| lost_job    | => | <i>I lost my job during COVID</i>                            |
| less_income | => | <i>I had less income/was temporary workless during COVID</i> |
| sick        | => | <i>I go sick</i>                                             |
| other       | => | <i>Other (please specify)</i>                                |

Visible if

Q: A:  
 :input[name="how\_have\_the\_covid\_19\_measures\_impacted\_your\_finances\_over\_the\_[impact\_income]"] - value => decreased

**Q: If you got sick, please specify (multiple answers possible) (\*)**

Type: choice\_multiple

A: multiple answers possible:

|                 |    |                                             |
|-----------------|----|---------------------------------------------|
| diagnosis_COVID | => | <i>I was diagnosed with COVID-19</i>        |
| diagnosis_other | => | <i>I was diagnosed with another disease</i> |

Visible if

|                                                                                    |                 |
|------------------------------------------------------------------------------------|-----------------|
| Q:                                                                                 | A:              |
| If your income decreased during/after COVID-19 lockdown, please specify the reason | - value => sick |

**Q: Other reason (please specify)**

Type: text

A: text input

Visible if

|                                                                                    |                  |
|------------------------------------------------------------------------------------|------------------|
| Q:                                                                                 | A:               |
| If your income decreased during/after COVID-19 lockdown, please specify the reason | - value => other |

**Q: Have you been vaccinated against seasonal flu since september 2019? (\*)**

Type: choice

A: one of the following:

|     |    |            |
|-----|----|------------|
| yes | => | <i>Yes</i> |
| no  | => | <i>No</i>  |

**Q: Would you consider vaccination against the flu for the coming season? (\*)**

Type: choice

A: one of the following:

|     |    |            |
|-----|----|------------|
| yes | => | <i>Yes</i> |
| no  | => | <i>No</i>  |

**Q: As a person with epilepsy, I have a higher risk of getting infected with COVID-19(\*)**

Type: choice

A: one of the following:

|       |    |              |
|-------|----|--------------|
| true  | => | <i>True</i>  |
| false | => | <i>False</i> |

## Epilepsy related questions

**Q: Compared to the period before the implementation of COVID-19 restrictions, how would you describe your seizure frequency? (\*)**

Type: choice\_scale

A: During the lockdown periodDuring the last two weeks



|                |    |                       |
|----------------|----|-----------------------|
| increased      | => | <i>Increased</i>      |
| decreased      | => | <i>Decreased</i>      |
| no_change      | => | <i>No change</i>      |
| not_applicable | => | <i>Not applicable</i> |

**Q: Are you currently taking anti-epileptic drugs? (\*)**

Type: choice

A: one of the following:

|     |    |            |
|-----|----|------------|
| yes | => | <i>Yes</i> |
| no  | => | <i>No</i>  |

**Q: How many anti-epileptic drugs (AED) are you currently taking? (\*)**

Type: choice

A: one of the following:

|    |    |              |
|----|----|--------------|
| 1  | => | <i>1</i>     |
| >1 | => | <i>&gt;1</i> |

Visible if

|                                                |                |
|------------------------------------------------|----------------|
| Q:                                             | A:             |
| Are you currently taking anti-epileptic drugs? | - value => yes |

**Q: Was your anti-epileptic drug (AED) therapy adapted during COVID? (\*)**

Type: choice

A: one of the following:

|                    |    |                                                            |
|--------------------|----|------------------------------------------------------------|
| yes_switched       | => | <i>Yes, I was switched to other AED</i>                    |
| yes_dose_increased | => | <i>Yes, the dose of my AED was increased</i>               |
| yes_dose_reduced   | => | <i>Yes, the dose of my AED was reduced</i>                 |
| yes_other          | => | <i>Yes, other (specify)</i>                                |
| postpone_changes   | => | <i>We decided to postpone changes until after COVID-19</i> |
| no                 | => | <i>No, this was never mentioned</i>                        |
| not_applicable     | => | <i>Not applicable</i>                                      |

**Q: Please specify other**

Type:  
text

A: text input

Visible if

|                                                                  |      |
|------------------------------------------------------------------|------|
| Q:                                                               | A:   |
| Was your anti-epileptic drug (AED) therapy adapted during COVID? | - => |

Q: Between January and June 2020, did you encounter problems obtaining your anti-epileptic drug (AED) treatment due to the measures taken against the coronavirus? (multiple answers possible) (\*)

Type: choice\_multiple

A: multiple answers possible:

|                   |    |                                                                                                   |
|-------------------|----|---------------------------------------------------------------------------------------------------|
| no                | => | No, I had no problems getting my anti-epileptic treatment                                         |
| yes_not_available | => | Yes, because AEDs were not available at the hospital/pharmacy                                     |
| yes_cannot_go     | => | Yes, because I couldn't go to the hospital/pharmacy due to COVID-19 related mobility restrictions |
| yes_no_income     | => | Yes, because I had no/less income to buy AEDs because of COVID-19                                 |
| yes_other         | => | Yes, for other reasons (specify)                                                                  |

Visible if

|                                                |                |
|------------------------------------------------|----------------|
| Q:                                             | A:             |
| Are you currently taking anti-epileptic drugs? | - value => yes |

Q: Specify other reasons

Type: text

A: text input

Visible if

|                                                                                                            |    |
|------------------------------------------------------------------------------------------------------------|----|
| Q:                                                                                                         | A: |
| :input[name="did_you_encounter_problems_obtaining_your_aed_treatment_due_to_t[yes_other]" ] - checked => 1 |    |

Q: Did this lead to an increase in seizure frequency? (\*)

Type: choice

A: one of the following:

|     |    |     |
|-----|----|-----|
| yes | => | Yes |
| no  | => | No  |

Visible if

|                                                                                                              |
|--------------------------------------------------------------------------------------------------------------|
| Q: A:                                                                                                        |
| 0 - :input[name="did_you_encounter_problems_obtaining_your_aed_treatment_due_to_t[yes_not_available]" ] => 1 |
| 2 - :input[name="did_you_encounter_problems_obtaining_your_aed_treatment_due_to_t[yes_cannot_go]" ] => 3     |
| 4 - :input[name="did_you_encounter_problems_obtaining_your_aed_treatment_due_to_t[yes_no_income]" ] => 5     |
| 6 - :input[name="did_you_encounter_problems_obtaining_your_aed_treatment_due_to_t[yes_other]" ] =>           |

Q: Since July 2020, did you encounter problems obtaining your anti-epileptic drug (AED) treatment due to the measures taken against the coronavirus? (multiple answers possible) (\*)

Type: choice\_multiple

A: multiple answers possible:

|                   |    |                                                                                                        |
|-------------------|----|--------------------------------------------------------------------------------------------------------|
| no                | => | <i>No, I have no problems getting my anti-epileptic treatment</i>                                      |
| yes_not_available | => | <i>Yes, because AEDs were not available at the hospital/pharmacy</i>                                   |
| yes_cannot_go     | => | <i>Yes, because I cannot go to the hospital/pharmacy due to COVID-19 related mobility restrictions</i> |
| yes_no_income     | => | <i>Yes, because I have no/less income to buy AEDs because of COVID-19</i>                              |
| yes_other         | => | <i>Yes, for other reasons (specify)</i>                                                                |

Visible if

|                                                |                |
|------------------------------------------------|----------------|
| Q:                                             | A:             |
| Are you currently taking anti-epileptic drugs? | - value => yes |

**Q: Specify other reasons**

Type: text

A: text input

Visible if

|                                                                                                            |    |
|------------------------------------------------------------------------------------------------------------|----|
| Q:                                                                                                         | A: |
| :input[name="since_july_2020_did_you_encounter_problems_obtaining_your_anti_e[yes_other]" ] - checked => 1 |    |

**Q: Did this lead to an increase in seizure frequency? (\*)**

Type: choice

A: one of the following:

|     |    |            |
|-----|----|------------|
| yes | => | <i>Yes</i> |
| no  | => | <i>No</i>  |

Visible if

|                                                                                                              |
|--------------------------------------------------------------------------------------------------------------|
| Q: A:                                                                                                        |
| 0 - :input[name="since_july_2020_did_you_encounter_problems_obtaining_your_anti_e[yes_not_available]" ] => 1 |
| 2 - :input[name="since_july_2020_did_you_encounter_problems_obtaining_your_anti_e[yes_cannot_go]" ] => 3     |
| 4 - :input[name="since_july_2020_did_you_encounter_problems_obtaining_your_anti_e[yes_no_income]" ] => 5     |
| 6 - :input[name="since_july_2020_did_you_encounter_problems_obtaining_your_anti_e[yes_other]" ] =>           |

**Q: Was the unavailability of anti-epileptic drugs (AED) already a problem before the onset of COVID? (\*)**

Type: choice

A: one of the following:

|     |    |            |
|-----|----|------------|
| yes | => | <i>Yes</i> |
| no  | => | <i>No</i>  |

Visible if

Q: A:

0 - :input[name="did\_you\_encounter\_problems\_obtaining\_your\_aed\_treatment\_due\_to\_t[yes\_not\_available]"] =>

1

2 - :input[name="since\_july\_2020\_did\_you\_encounter\_problems\_obtaining\_your\_anti\_e[yes\_not\_available]"] =>

Q: Did you experience reluctance to seek medical care because of COVID-19? (multiple answers possible)(\*)

Type: choice\_multiple

A: multiple answers possible:

|                                   |    |                                                                                |
|-----------------------------------|----|--------------------------------------------------------------------------------|
| no                                | => | No                                                                             |
| yes_fear                          | => | Yes, due to fear of getting infected with COVID-19                             |
| yes_symptoms_not_important        | => | Yes, because I thought my symptoms were not that important during the pandemic |
| yes_occupied_healthcare_providers | => | Yes, because I thought healthcare providers were occupied                      |
| yes_healthcare_less_accessible    | => | Yes, because healthcare was less accessible during COVID-19                    |
| yes_other                         | => | Yes, for other reasons (specify)                                               |

Q: Please specify for other reasons

Type:  
text

A: text input

Visible if

Q:

A:

:input[name="did\_you\_experience\_reluctance\_to\_seek\_medical\_care\_because\_of\_co[yes\_other]"] - checked => 1

Q: Are you taking anti-depressants/anxiolytic treatment? (\*)

Type: choice

A: one of the following:

|                 |    |                                                                |
|-----------------|----|----------------------------------------------------------------|
| yes_long_time   | => | Yes, since a long time                                         |
| yes_since_covid | => | Yes, I started taking them during the COVID-19 epidemic period |
| no              | => | No                                                             |

Q: Did you have any doctor's visit planned during the COVID-19 lockdown period? (\*)

Type: choice

A: one of the following:

|     |    |     |
|-----|----|-----|
| yes | => | Yes |
| no  | => | No  |

Q: If yes, what happened to this planned visit given the confinement measures? (\*)

Type: choice

A: one of the following:

|                               |    |                                                 |
|-------------------------------|----|-------------------------------------------------|
| cancelled_me                  | => | <i>Was cancelled by me</i>                      |
| cancelled_healthcare_provider | => | <i>Was cancelled by the healthcare provider</i> |
| changed_to_telephone_consult  | => | <i>Was changed to telephone consult</i>         |
| took_place                    | => | <i>Took place as planned</i>                    |
| changed_to_video_consult      | => | <i>Was changed to video consult</i>             |

Visible if

|                                                                              |                |
|------------------------------------------------------------------------------|----------------|
| Q:                                                                           | A:             |
| Did you have any doctor's visit planned during the COVID-19 lockdown period? | - value => yes |

**Q: If changed to telephone or video consult, had this already taken place? (\*)**

Type: choice

A: one of the following:

|     |    |            |
|-----|----|------------|
| yes | => | <i>Yes</i> |
| no  | => | <i>No</i>  |

Visible if

|                                        |
|----------------------------------------|
| Q: A:                                  |
| 0 - :input[name="if_yes_this_vist"] => |
| 1                                      |
| 2 - :input[name="if_yes_this_vist"] => |

**Q: On a scale of 1 (totally disagree) to 5 (totally agree), to what extent do you agree with the following statements? (\*)**

Type: choice\_scale

A: I was very satisfied with the telephone or video consult I was able to discuss everything I planned to discuss I was equally satisfied as with an in-person meeting

|   |    |          |
|---|----|----------|
| 1 | => | <i>1</i> |
| 2 | => | <i>2</i> |
| 3 | => | <i>3</i> |
| 4 | => | <i>4</i> |
| 5 | => | <i>5</i> |

Visible if

|                                                                         |                |
|-------------------------------------------------------------------------|----------------|
| Q:                                                                      | A:             |
| If changed to telephone or video consult, had this already taken place? | - value => yes |

**Q: What did you discuss during the telephone or video consultation (multiple answers possible) (\*)**

Type: choice\_multiple

A: multiple answers possible:

|                   |    |                                        |
|-------------------|----|----------------------------------------|
| seizure_situation | => | <i>Discussion of seizure situation</i> |
| test_results      | => | <i>Discussion of test results</i>      |

|                             |    |                                                                         |
|-----------------------------|----|-------------------------------------------------------------------------|
| evaluation_treatment        | => | <i>Evaluation of treatment and possible side effects</i>                |
| scheduling_investigations   | => | <i>Scheduling of new investigations</i>                                 |
| prescription                | => | <i>Writing prescription for anti-epileptic drug</i>                     |
| COVID-19_related_worries    | => | <i>Discussion of COVID-19 related worries</i>                           |
| psychological_problems      | => | <i>Discussion of psychological problems</i>                             |
| requested_in-person_meeting | => | <i>I was requested to come to the hospital for an in-person meeting</i> |
| requested_admission         | => | <i>I was requested to come to the hospital for an admission</i>         |
| other                       | => | <i>Other (specify)</i>                                                  |

Visible if

|                                                                         |                |
|-------------------------------------------------------------------------|----------------|
| Q:                                                                      | A:             |
| If changed to telephone or video consult, had this already taken place? | - value => yes |

**Q: Please specify other**

Type: text

A: text input

Visible if

|                                                                                        |                |
|----------------------------------------------------------------------------------------|----------------|
| Q:                                                                                     | A:             |
| :input[name="what_did_you_discuss_during_the_telephone_or_video_consultation_[other]"] | - checked => 1 |

**Q: At the present moment, how do you feel about going to the hospital for a follow-up visit with your doctor? (many answers possible) (\*)**

Type: choice\_multiple

A: multiple answers possible:

|                                      |    |                                                                                |
|--------------------------------------|----|--------------------------------------------------------------------------------|
| safe                                 | => | <i>I think it is safe to go to the hospital now</i>                            |
| scarred_infected                     | => | <i>I am still scared of getting infected with COVID-19 in the hospital</i>     |
| busy_healthcare_providers            | => | <i>I think that the healthcare providers are still very busy with COVID-19</i> |
| prefer_telephone_video_consultations | => | <i>I prefer telephone/video consultations, and I want to continue that way</i> |
| other                                | => | <i>Other (specify)</i>                                                         |

**Q: Please specify other**

Type: text

A: text input

Visible if

|                                                                                        |                |
|----------------------------------------------------------------------------------------|----------------|
| Q:                                                                                     | A:             |
| :input[name="at_the_present_moment_how_do_you_feel_about_going_to_the_hospita[other]"] | - checked => 1 |

**Q: Do you belong to an association that supports persons with epilepsy? (\*)**

Type: choice

A: one of the following:

|     |    |     |
|-----|----|-----|
| yes | => | Yes |
| no  | => | No  |

**Q: I fully understand what this study is about, and I consent to participate. All the information I provide can be used by researchers to better understand the impact of the coronavirus pandemic on persons with epilepsy. (\*)**

Type: checkbox

A: checkbox

**Q: I consent to be contacted for a follow-up survey in a few weeks**

Type: checkbox

A: checkbox

**Q: Please provide an e-mail address to contact you in a few weeks**

Type:  
text

A: text input

Visible if

|                                                                 |                |
|-----------------------------------------------------------------|----------------|
| Q:                                                              | A:             |
| I consent to be contacted for a follow-up survey in a few weeks | - checked => 1 |
